# Supplementary material for: Using AnABlast for intergenic sORF prediction in the Caenorhabditis elegans genome
Source: PubMed Central journal article supplement — Bioinformatics. 2020 Jul 2;36(19):4827–32. doi: 10.1093/bioinformatics/btaa608 (PMC7723330; doi:10.1093/bioinformatics/btaa608), 2020-07-02
Supplement: btaa608_supplementary_data.pdf [file btaa608_supplementary_data.pdf]

# Supplementary information

## Supplementary Figures

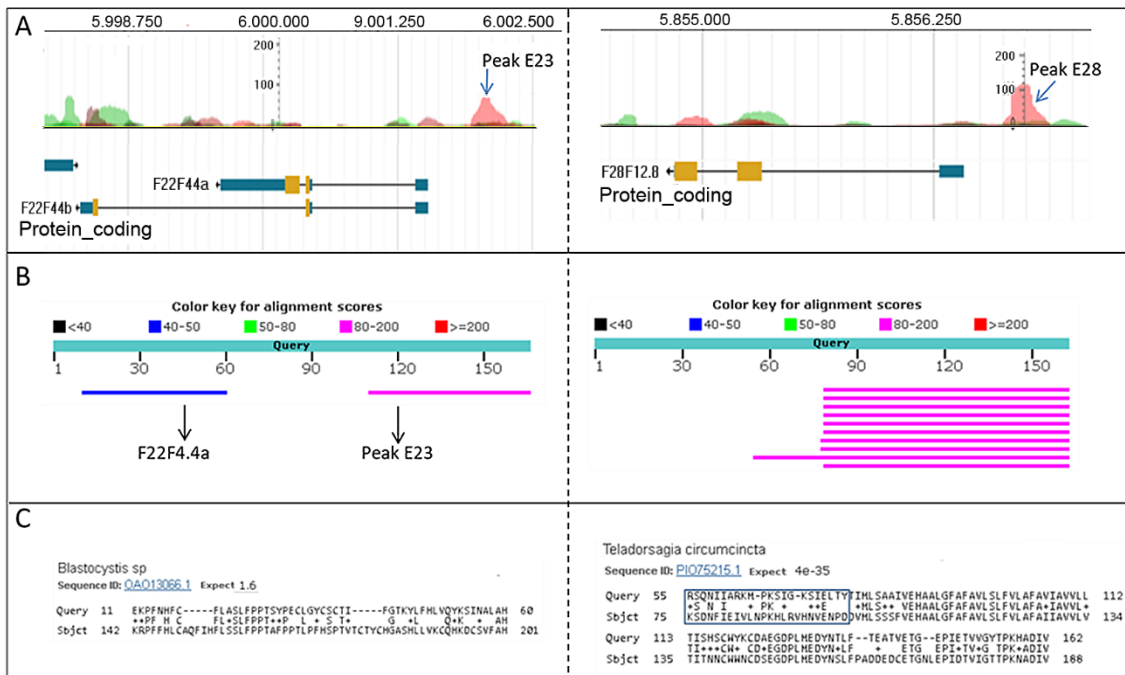

**Supplementary Fig. S1.** Putative new exons identified by AnABlast peaks E23 (X:6001927..6002254) and E28 (V:5856625..5856859). A) Peaks E23 (left) and E28 (right) (squared). Annotated exons of their respective adjacent genes F22F4.4a and F28F12.8 are shown. B) Top BLASTp hits of E23 (left) and E28 (right) predicted protein sequences. C) E23 (left) and E28 (right) protein sequence alignments to proteins found in the indicated specie. Exon E28 sequences is highlighted in box. Sequence ID and alignment significance (Expected E-value) are indicated.

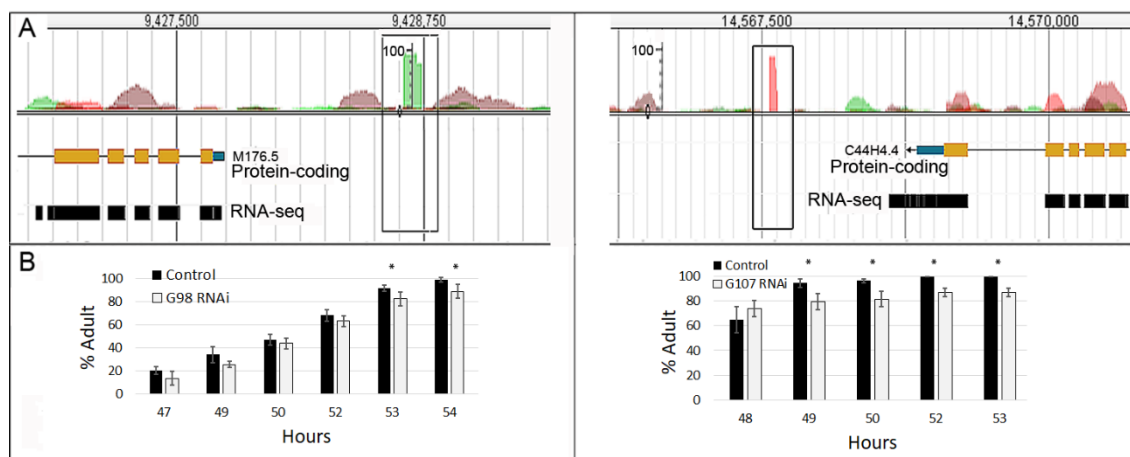

**Supplementary Fig. S2.** RNAi analysis of AnABlast peaks G98 (II: 9428645..9428735) and G107 (X: 14567563-14567626). A) AnABlast profiles showing peak G98 (left) and peak G107 (right) and peaks matching exons encoding their respective adjacent protein M175.5 and C44H4. Peaks G98 and G107 are indicated (squares). RNA expression data (RNA-seq) are shown. B) Average worms (%) that reaches adulthood from L1 (time 0 hours) in worms subject to E98 (left) or E107 (right) RNAi (grey) with respect to their controls (black). Standard deviation bars are shown. \* means  $P \leq 0,05$ .

## Supplementary Tables

**Supplementary Table S1.** Accuracy of AnAblast in the identification of non-redundant intergenic sORFs found at <http://www.sorfs.org/database> for *C. elegans*. A representative sORF reference is described for the indicated genome interval. sORF length (number of amino acids), Evidences of expression reported in WormBase (“-” Not reported, “+” RNA-seq, “++” Polysomes, “+++” both), AnAblast prediction at the sORF genomic interval (Peak height: “-” Not significant, “+” 5-14, “++” 15-24) “+++” >25), and representative related coding sequence identified by BLASTp search (default parameters) against the non-redundant protein sequence data base (length of the target protein and E-value of the alignment are indicated) and remarks are indicated.

| sORF reference                         | Genome interval      | sORF length | Expr. | Anablast prediction | Related Coding Sequence and Remarks                                                                                                                                                                                                                                                                                                                                                                               |
|----------------------------------------|----------------------|-------------|-------|---------------------|-------------------------------------------------------------------------------------------------------------------------------------------------------------------------------------------------------------------------------------------------------------------------------------------------------------------------------------------------------------------------------------------------------------------|
| <a href="#">arnold c14 2014:151752</a> | III:5094893..5095009 | 38          | +     | ++                  | Annotated sORF CELE_F54D8.10<br>No similar proteins.                                                                                                                                                                                                                                                                                                                                                              |
| <a href="#">arnold c14 2014:229152</a> | IV:7053788..7053817  | 9           | +++   | ++                  | Annotated sORF CELE_F54H12.3<br>No similar proteins.                                                                                                                                                                                                                                                                                                                                                              |
| <a href="#">arnold n2 2014:113038</a>  | II:5758546..5758620  | 24          | ++    | -                   | Annotated sORF CELE_F10C1.23<br>No similar proteins.                                                                                                                                                                                                                                                                                                                                                              |
| <a href="#">arnold n2 2014:505973</a>  | X:4702799..4702855   | 18          | -     | -                   | Not annotated<br>Similar proteins:<br>-AquaPorin (Caenorhabditis elegans)<br>Sequence ID: NP_001359963.1<br>Length: 330 E-value: 1e-09<br>-hypothetical protein B9Z55_024173 (Caenorhabditis nigoni)<br>Sequence ID: PIC18191.1<br>Length: 297 E-value: 1e-09                                                                                                                                                     |
| <a href="#">hendriks 2014:175563</a>   | II:2725608..2725649  | 13          | +     | -                   | Annotated sORF CELE_T05A8.11<br>No similar proteins.                                                                                                                                                                                                                                                                                                                                                              |
| <a href="#">hendriks 2014:175658</a>   | II:5803854..5803913  | 19          | +     | +                   | Not annotated<br>Similar proteins:<br>-TIL domain-containing protein (Caenorhabditis elegans)<br>Sequence ID: NP_001343656.1<br>Length: 171 E-value: 1e-10<br>-hypothetical protein CRE_11990 [Caenorhabditis remanei]<br>Sequence ID: XP_003109086.1<br>Length: 169 E-value: 9e-06<br>-hypothetical protein FL83_04414, partial [Caenorhabditis latens]<br>Sequence ID: OZG21110.1<br>Length: 169 E-value: 9e-06 |
| <a href="#">hendriks 2014:175699</a>   | II:8982729..8982761  | 10          | +     | -                   | Not annotated.<br>No similar proteins.<br><br>located at the 5' utr of gene C18E9.7                                                                                                                                                                                                                                                                                                                               |
| <a href="#">hendriks 2014:262</a>      | I:2945458..2945487   | 9           | ++    | +                   | Not annotated<br>No similar proteins.                                                                                                                                                                                                                                                                                                                                                                             |
| <a href="#">hendriks 2014:331543</a>   | III:4324159..4324236 | 25          | +     | +                   | Not annotated.<br>Similar proteins:<br>-Uncharacterized CELE_H38K22.9 (Caenorhabditis elegans)<br>Sequence ID: NP_001368690.1<br>Length: 25 E-value: 1e-21                                                                                                                                                                                                                                                        |
| <a href="#">hendriks 2014:331740</a>   | III:1901967..1902038 | 23          | +     | +                   | Not annotated.<br>No similar proteins.                                                                                                                                                                                                                                                                                                                                                                            |
| <a href="#">hendriks 2014:658572</a>   | V:6452777..6452872   | 31          | +++   | +                   | Not annotated.<br>No similar proteins.                                                                                                                                                                                                                                                                                                                                                                            |
| <a href="#">hendriks 2014:823799</a>   | X:5450031..5450201   | 56          | +     | +                   | Not annotated                                                                                                                                                                                                                                                                                                                                                                                                     |

|                                        |                      |    |    |     |                                                                                                                                                                                                                                                                                                                                                                                                             |
|----------------------------------------|----------------------|----|----|-----|-------------------------------------------------------------------------------------------------------------------------------------------------------------------------------------------------------------------------------------------------------------------------------------------------------------------------------------------------------------------------------------------------------------|
|                                        |                      |    |    |     | Tandem repeat of the 3' exon of gene C25F6.6                                                                                                                                                                                                                                                                                                                                                                |
| <a href="#">hendriks 2014:823914</a>   | X:3025113..3025163   | 16 | +  | -   | Not annotated.<br>No similar proteins.                                                                                                                                                                                                                                                                                                                                                                      |
| <a href="#">hendriks 2014:823999</a>   | X:4783780..4783821   | 13 | +  | -   | Annotated sORF CELE_F43C9.2<br>No similar proteins.                                                                                                                                                                                                                                                                                                                                                         |
| <a href="#">hendriks 2014:824045</a>   | X:5659967..5660023   | 18 | +  | -   | Annotated sORF CELE_T22B7.22<br>No similar proteins.                                                                                                                                                                                                                                                                                                                                                        |
| <a href="#">hendriks 2014:824117</a>   | X:11267038..11267298 | 86 | +  | ++  | Annotated sORF CELE_C03A3.9<br>No similar proteins.                                                                                                                                                                                                                                                                                                                                                         |
| <a href="#">hendriks 2014:824131</a>   | X:12148633..12148665 | 10 | +  | -   | Not annotated.<br>No similar proteins.                                                                                                                                                                                                                                                                                                                                                                      |
| <a href="#">nedialkova 2015:108298</a> | II:9418511..9418513  | 48 | +  | -   | Annotated sORF CELE_M176.16<br>No similar proteins.                                                                                                                                                                                                                                                                                                                                                         |
| <a href="#">nedialkova 2015:108339</a> | II:2895597..2895668  | 23 | +  | ++  | Not annotated.<br>Similar proteins:<br>-UBIQUITIN_CONJUGAT_2 domain-containing protein (Caenorhabditis elegans)<br>Sequence ID: NP_001348718.1<br>Length: 238 E-value: 9e-13                                                                                                                                                                                                                                |
| <a href="#">nedialkova 2015:204387</a> | III:8326386..8326598 | 70 | +  | ++  | Annotated sORF CELE_ZC262.13<br>Similar proteins:<br>-hypothetical protein FL83_22023, partial (Caenorhabditis latens)<br>Sequence ID: OZF89903.1<br>Length: 98 E-value: 2e-29<br>-hypothetical protein FL81_17889 (Caenorhabditis remanei)<br>Sequence ID: POM29574.1<br>Length: 98 E-value: 2e-29<br>-Protein CBG25937 (Caenorhabditis briggsae)<br>Sequence ID: CAS00299.1<br>Length: 86 E-value: 1e-27  |
| <a href="#">nedialkova 2015:204436</a> | III:2528650..2528679 | 9  | +  | -   | Annotated sORF CELE_Y54F10AM.15<br>No similar proteins.                                                                                                                                                                                                                                                                                                                                                     |
| <a href="#">nedialkova 2015:27</a>     | I:10380793..10380921 | 42 | ++ | +   | Annotated sORF CELE_F45H11.11<br>Similar proteins:<br>-Unnamed protein product (Heligmosomoides polygyrus)<br>Sequence ID: VDP01011.1<br>Length: 118 E-value: 3e-08                                                                                                                                                                                                                                         |
| <a href="#">nedialkova 2015:412435</a> | V:14547397..14547441 | 14 | +  | -   | Annotated sORF CELE_Y54F10AM.15<br>No Similar proteins.<br>Located at the 5' utr of the rbc-2 gene                                                                                                                                                                                                                                                                                                          |
| <a href="#">nedialkova 2015:516194</a> | X:5259950..5260078   | 42 | +  | +++ | Not annotated<br>Similar proteins:<br>-hypothetical protein CRE_00743 (Caenorhabditis remanei)<br>Sequence ID: XP_003117941.1<br>Length: 125 E-value: 1e-21<br>-hypothetical protein B9Z55_024276 (Caenorhabditis nigoni)<br>Sequence ID: PIC18352.1<br>Length: 125 E-value: 2e-20<br>-Hypothetical protein CBG14648 (Caenorhabditis briggsae)<br>Sequence ID: XP_002644667.1<br>Length: 125 E-value: 2e-20 |

|                                     |                      |    |    |   |                                                                                                        |
|-------------------------------------|----------------------|----|----|---|--------------------------------------------------------------------------------------------------------|
| <a href="#">stadler_2012:136758</a> | II:8766809..8766838  | 9  | -  | - | Annotated sORF CELE_K08F8.15<br>No similar proteins.<br><br>Located at a pah-1 gene intron (antisense) |
| <a href="#">stadler_2012:256915</a> | III:5863632..5863715 | 27 | +  | - | Not annotated.<br>No similar proteins.<br>Located at the 5' utr of the dnpp-1 gene                     |
| <a href="#">stadler_2012:54</a>     | I:15064721..15064759 | 12 | ++ | + | Not annotated.<br>No similar proteins.                                                                 |
| <a href="#">stadler_2012:639775</a> | X:3147194..3147226   | 10 | +  | - | Not annotated.<br>No similar proteins.<br>Located at the 3' utr of the C15C7.4 gene                    |

**Supplementary Table S2.** Accuracy of AnAblast in the identification of curated genes coding less than 100 amino acids length peptides. Coding genome interval, peptide length (number of amino acids), AnAblast prediction (peak height: "-" Not significant, "+" 5-29, "++" 30-89) "+++" >90), and reported sORFs entries at the coding genomic interval of the gene ("-" None, "+" 1-2, "++" 3-4, "+++" >4) are indicated.

| Gene     | Genome interval               | Encoded Peptide length | AnAblast Peak height | Reported sORFs |
|----------|-------------------------------|------------------------|----------------------|----------------|
| fipr-16  | <u>III:8590833..8590982</u>   | 49                     | +                    | -              |
| fipr-3   | <u>X:14423405..14423883</u>   | 50                     | +                    | -              |
| fipr-15  | <u>IV:10880564..10880716</u>  | 50                     | ++                   | -              |
| rpl-39   | <u>V:7775742..7776079</u>     | 51                     | +++                  | +++            |
| R05D3.6  | <u>III:8350419..8350805</u>   | 54                     | ++                   | -              |
| ZC262.5  | <u>III:8342224..8342610</u>   | 54                     | +                    | -              |
| T23F2.4  | <u>X:5514798..5515080</u>     | 57                     | +++                  | -              |
| tomm-7   | <u>III:7859613..7860159</u>   | 58                     | ++                   | +++            |
| C04G6.5  | <u>II:5085785..5086121</u>    | 59                     | ++                   | -              |
| gpc-1    | <u>X:12881126..12884989</u>   | 62                     | ++                   | -              |
| mtl-2    | <u>V:14018270..14018673</u>   | 63                     | +                    | ++             |
| fip-1    | <u>III:8639791..8640093</u>   | 63                     | -                    | -              |
| nola-3   | <u>I:10179042..10179236</u>   | 64                     | +++                  | +++            |
| rps-28   | <u>IV:1659691..1660011</u>    | 65                     | +++                  | +++            |
| nlp-28   | <u>V:3987900..3988312</u>     | 65                     | -                    | +              |
| sid-5    | <u>X:6904721..6905849</u>     | 67                     | +                    | ++             |
| emo-1    | <u>V:10896658..10897143</u>   | 68                     | +++                  | +++            |
| flp-24   | <u>III:725022..726155</u>     | 69                     | -                    | ++             |
| cpg-9    | <u>IV:3067848..3069876</u>    | 69                     | ++                   | ++             |
| nlp-30   | <u>V:3981980..3982741</u>     | 69                     | +                    | +              |
| rpl-38   | <u>V:15512166..15512780</u>   | 70                     | +++                  | +++            |
| ubl-5    | <u>I:5607820..5608841</u>     | 73                     | +++                  | -              |
| nlp-29   | <u>V:3984413..3984847</u>     | 73                     | -                    | +              |
| nlp-33   | <u>V:11147336..11147737</u>   | 74                     | -                    | -              |
| mtl-1    | <u>V:6691371..6691863</u>     | 75                     | ++                   | ++             |
| nlp-31   | <u>V:3980055..3980622</u>     | 75                     | +                    | -              |
| ins-23   | <u>III:10028247..10028600</u> | 76                     | +                    | -              |
| ins-21   | <u>III:10023804..10024120</u> | 76                     | ++                   | -              |
| snr-7    | <u>I:2727014..2727545</u>     | 77                     | +++                  | +++            |
| ned-8    | <u>I:10373368..10373862</u>   | 77                     | +++                  | +++            |
| tmem-258 | <u>V:7063174..7063718</u>     | 79                     | ++                   | +++            |
| emb-1    | <u>III:5173439..5173809</u>   | 81                     | ++                   | +              |
| nlp-36   | <u>III:9488731..9489188</u>   | 82                     | ++                   | +++            |
| rmo-1    | <u>II:13237404..13237907</u>  | 82                     | +++                  | -              |
| moag-4   | <u>I:2064909..2065481</u>     | 82                     | ++                   | +++            |
| dss-1    | <u>III:1194367..1196292</u>   | 82                     | ++                   | +++            |
| ddp-1    | <u>III:1859888..1860381</u>   | 83                     | +++                  | +++            |
| flp-23   | <u>III:8650764..8652190</u>   | 83                     | +                    | -              |
| rps-27   | <u>V:103394..104064</u>       | 83                     | +++                  | +++            |
| ins-22   | <u>III:10026289..10026673</u> | 83                     | ++                   | -              |
| kreg-1   | <u>X:8709764..8710137</u>     | 83                     | +                    | -              |
| ceh-7    | <u>II:8703368..8703829</u>    | 84                     | +++                  | -              |
| flp-26   | <u>X:7029136..7029638</u>     | 84                     | +                    | -              |
| abf-1    | <u>I:3886111..3887080</u>     | 85                     | +                    | -              |
| snr-5    | <u>III:7862070..7862577</u>   | 85                     | +++                  | -              |
| abf-2    | <u>I:3885548..3885905</u>     | 85                     | ++                   | -              |
| acbp-1   | <u>I:4635722..4637328</u>     | 86                     | +++                  | +++            |

|                |                               |    |     |     |
|----------------|-------------------------------|----|-----|-----|
| <b>vha-17</b>  | <u>IV:9321801..9322528</u>    | 86 | +++ | +++ |
| <b>tin-10</b>  | <u>III:11500867..11502852</u> | 86 | +++ | +++ |
| <b>moa-2</b>   | <u>II:7698613..7699046</u>    | 87 | +++ | +++ |
| <b>rps-21</b>  | <u>III:7189142..7189631</u>   | 88 | +++ | +++ |
| <b>mai-1</b>   | <u>X:3114668..3116538</u>     | 88 | +++ | -   |
| <b>flp-19</b>  | <u>X:10604686..10605828</u>   | 89 | +   | +   |
| <b>lury-1</b>  | <u>III:12186411..12190116</u> | 89 | ++  | -   |
| <b>baf-1</b>   | <u>III:9467464..9468058</u>   | 89 | +++ | +++ |
| <b>flp-27</b>  | <u>II:5680980..5682667</u>    | 89 | ++  | +   |
| <b>dlc-1</b>   | <u>III:6462907..6463801</u>   | 89 | +++ | +++ |
| <b>snr-6</b>   | <u>III:12429172..12429630</u> | 90 | +++ | ++  |
| <b>tin-9.1</b> | <u>IV:7044058..7044602</u>    | 90 | +++ | ++  |
| <b>emre-1</b>  | <u>X:14979374..14980435</u>   | 90 | ++  | ++  |
| <b>dlc-2</b>   | <u>IV:12110586..12111577</u>  | 90 | +++ | ++  |
| <b>rpl-43</b>  | <u>II:14155280..14155660</u>  | 91 | +++ | +++ |
| <b>rpl-37</b>  | <u>III:3528547..3528968</u>   | 91 | +++ | -   |
| <b>sno-1</b>   | <u>I:1340678..1341258</u>     | 91 | +++ | +++ |
| <b>ins-11</b>  | <u>II:5556761..5557088</u>    | 91 | +   | -   |
| <b>mpe-4</b>   | <u>III:8270790..8271776</u>   | 91 | +   | -   |
| <b>flp-5</b>   | <u>X:8528250..8531033</u>     | 92 | +++ | +   |
| <b>flp-16</b>  | <u>II:13235306..13237417</u>  | 92 | -   | -   |
| <b>flp-22</b>  | <u>I:8658874..8659967</u>     | 93 | ++  | ++  |
| <b>ufm-1</b>   | <u>III:7858979..7859512</u>   | 94 | ++  | ++  |
| <b>cks-1</b>   | <u>IV:8513919..8514725</u>    | 94 | +++ | +   |
| <b>dpm-3</b>   | <u>IV:12391591..12392120</u>  | 95 | +++ | ++  |
| <b>tag-209</b> | <u>II:10787312..10787914</u>  | 99 | +   | -   |

**Supplementary Table S3.** Genome intervals highlighted by AnAblast as putative new intergenic sORFs (82). AnAblast peak height (protomotifs accumulation), Expression evidence data, homologs/motifs, predicted amino acid sequence (ORF) and the number of residues (ORF\_length) are described.

| Peak | Genome interval           | Peak height. | Expres.  | Homolgs/<br>Motifs                              | ORF                                                                                                                                                                                                                          | ORF length |
|------|---------------------------|--------------|----------|-------------------------------------------------|------------------------------------------------------------------------------------------------------------------------------------------------------------------------------------------------------------------------------|------------|
| G5   | IV:1213206..1<br>213443   | 88           | Polysome | -/-                                             | MDTLAIKRRSEQKVVGSYEPTGEMGNEL<br>KRWKKERKGVLENGGTYRLVVREHQI<br>FWEGEKDGSLWGDFFSYTYTLRLH                                                                                                                                       | 80         |
| G14  | II:11736898..1<br>1737084 | 175          | RNAseq   | -/-                                             | MEDTKRVFGILPGKLLHLSRSYSTLKHII<br>LRASRSTFQA                                                                                                                                                                                  | 39         |
| G22  | III:670901..67<br>1255    | 74           | RNA-seq  | -/-                                             | MRHKKEGSIACELMRFESYLLAHGGDD<br>HHLNESLYFLYLDLSLHFPCKILFSGIRKGE<br>GRNLKVTMKIAYDTRRIISQRLVKIAFSPS<br>TTGFAATHRLP<br>GTSGEQFLAASPNTLFPGRSWSRQLFL<br>FLQKKRERERATTNSINTDLKTSSSVFSL<br>LQES                                      | 162        |
| G23  | III:5838386..5<br>838494  | 71           | RNA-seq  | -/-                                             | ISHRHEALRKSFLINWRVNSPSHKDQE<br>KLEKRQILPVAAK                                                                                                                                                                                 | 41         |
| G25  | X:17515475..1<br>7515919  | 70           | RNA-seq  | -/-                                             | MELECSGLLILNKKRFFSQNFLKFKVCFEI<br>ITFSSQKINEKISIRMSHYHSDQTFKYQI<br>VNNNSAFQSRQFPVNNQWKPLIGLSTRY<br>GQDNILMEHKIWLKIGNIKFKKPQHTGK<br>SPHCAQPTSSVLFASNYFKHLLRGEKFKQ<br>RA KLKEKVFEYSELYLLQNFATLHIRTG                            | 175        |
| G26  | II:11717583..1<br>1718477 | 297          | RNA-seq  | -/ PF07735 (F-box<br>associated)                | MVAVELNISYQTQCCVFRFNHNSVNIKIDF<br>PNGYYWNGTRRLCEEIELRYTEIDMFQR<br>PYRWFWFMPKVSARYVDHILKTFNRGK<br>VLRLKIDCDAREFMNLNEFNDIRFESLWI<br>RKL RNANYFFNLKEFINQAYSLLLRDSEF<br>TTLPKFQIDFCQNERIELWSFSMNLNTL<br>LLCNFKEISLITSINLADINLFTK | 199        |
| G30  | II:13644506..1<br>3644671 | 196          | RNA-seq  | (O02112_CAEL)/-                                 | IQAFFVFVSAVLDVVKLYLNFFSDGIERV<br>DCSDGYDIERNDDLATVFYQNMGTDFV<br>VWHDREFPTYSHRNLPST                                                                                                                                           | 75         |
| G31  | I:12928143..12<br>928563  | 164          | RNA-seq  | (G8JLX0_CAEL)/<br>PF07735 (F-box<br>associated) | LIINYSNWFNLDYLLKSDSVNIHLYDFVW<br>NPADLNRFLRSWLLSESNVKLTFLVENIA<br>NRDSLEQILDLPEDSIVRNEENRYSANK<br>FVLKSCFLWQRTICNCMFLSRRVKNPTK<br>RRKESCTTHLFCSLARQIRLYISCLLRKYV<br>ICSRNNLNKVIKILVTVAKKI                                    | 167        |
| G32  | V:13396252..1<br>3396714  | 84           | RNA-seq  | -/-                                             | ILRDIEGIFCRNTDESLRGLGRLVFVDILIK<br>TTDYRISSHEPSGLHFWGNWVGDKMEIF<br>QNMWDKLEKGLDRRTIGAPGLLHRRRA<br>AKTNLRPSALIHTRYQHPPPLRFAQCPS<br>YTHHTQKRRRGHILCDKEGIFRQVREG<br>DTGRRVHTLIGRTRDGLPSRLDANTCGS<br>LRVE                        | 176        |
| G43  | X:15015384..1<br>5015639  | 233          | RNA-seq  | -/-                                             | MNFAKQAKPDCFAHRTYKAYKNKNET<br>FHISGRKTILKNQFLYRKAVYS                                                                                                                                                                         | 49         |
| G45  | III:7833431..7<br>833716  | 102          | RNA-seq  | (Q9XWD9_CAEL)/<br>-                             | MYAWQNFNTGNHTLKLGEAAIHLYDLI<br>FPPCSDRDGIATCLISLGLKQKCVARTLS<br>HDEIRLDKWINTYLTMTLFRHYRSCILLS<br>YSYNILLFFF                                                                                                                  | 97         |
| G46  | I:7316251..731<br>6590    | 70           | RNA-seq  | -/-                                             | MQIRETERTVEERSKKIGWSSVTASSFLS<br>FISQFPLNTKMRRMGCRSAIFTQKRLSY<br>RKAKGDMIERAADPKPKIDPQRKWLITL<br>SSLQGFIKTFSSS<br>RFPFKYFREYEHCEYLKGET                                                                                       | 122        |
| G49  | V:14367725..1<br>4368037  | 74           | RNA-seq  | -/-                                             | ILSCGLSCSFLNKCFALRTPQVFRPTFSIF<br>PENRGIFIVMDMTSRIPNNKKYTLTPNSL<br>TCCRKFQRSNRELELLKTWLPARLHDLF<br>VLSRYIKYRYNHSLKLYQYSQYFHLNIAL<br>NL                                                                                       | 119        |
| G50  | X:16728266..1<br>6728758  | 93           | RNA-seq  | -/-                                             | MHRFTLNFARKCPMILQTFEIQVYPPFRN<br>QITEAKVSPQNLIVYKFHQQLFAEYLISPP<br>ECGGVERTQKLSSVIYEVRRHRTLAKQEK<br>GKNWKLATTMQ<br>NSTSEVGMRIGLRKKKWKGDQRKEKI                                                                                | 126        |

|     |                       |      |         |                                                                     |                                                                                                                                                                                                                                                                            |     |
|-----|-----------------------|------|---------|---------------------------------------------------------------------|----------------------------------------------------------------------------------------------------------------------------------------------------------------------------------------------------------------------------------------------------------------------------|-----|
| G51 | V:8646870..8647347    | 98   | RNA-seq | -/-                                                                 | ITVTILLNLTSKHLPISIINIPDLRKLPAQGY<br>PKPLRRQTRTPERNQISGTRSGTTLNEVT<br>EKVSKCVHLFSGRLTILWVYVRDKEMMI<br>ERMFDRLYGGTYLDMISLFWKPRVFFCL<br>LITFFCWVHLHIPICVGIIRLCSFLMFLGFIF<br>NFPRYKIKNTTTRVNIQM                                                                                | 165 |
| G52 | IV:379001..379340     | 71   | RNA-seq | -/-                                                                 | ILKMNLSIAHLEKLELIKFYIIFSRNSSTIH<br>PHCHGTFKDFSLTRVLVFGTKKSLLVII<br>VITLTYNHKALRTFIVETAWMHTHPQISS<br>NLVGDCEQKRRREIRKTERQIDSRDTNV<br>RCFIGTQSVKDHREPRHRLICR                                                                                                                 | 140 |
| G54 | III:4101011..4101389  | 139  | RNA-seq | (A0A0U5FV96_9EUR0)/-                                                | IFINLKSQQNKLVGMAAQGISIEPIEKQTE<br>TKKKPQIFFLKSPNPSKDRRLDRIRQEUR<br>EKQKVLRRRIHNRIRGIVNDKVSEEMGFCF<br>ETLCWVHNHTFIGGEVGFVKYKRNVKV<br>GKQQCFNVQVLSCDGEAFKNE                                                                                                                  | 138 |
| G57 | X:541358..541951      | 1820 | -       | RNA-directed DNA polymerase/<br>Integrase domain containing protein | MSQFLLHYRATPSNALGGLTPAEVHYGR<br>RLRTRTSLMMPRKDHSEDSTASTLAMK<br>DQFDKHNRAKARYFHEDEKVFVKVYER<br>NSWSWKPGKVANKQGVVYVNYLDDGR<br>ERAVHANQLKPRVDEKETVVRVNAWKDT<br>MSDTSELLPYDNEDYEVIERKTKLPTIMP<br>TLKEDNSGSSSTTPAQPVQSPVQGPVQ<br>GDHAQQDALVLLPNARGSPRATSPVPI<br>RRSTRQHSIRFDPCA | 59  |
| G58 | V:19477929..19478157  | 243  | RNA-seq | -/ PF00097 (Zinc finger, C3HC4 type)                                | MTVGRQAILLECGHTFCIQCVENNKENSA<br>VRYLDCFDLSAIRLRSEYMESNNLFIYSYR<br>YTFFKVTIKRFLI                                                                                                                                                                                           | 72  |
| G61 | V:10709701..10709983  | 424  | -       | -/-                                                                 | MGLLKYEIKKRANSRSKSSKAIECISSKYE<br>NSHTSNILIKYSLKPYACNPFNDCFITNSL<br>LQLHRIIPVIQYTRCSNLDYDKSVESTETM<br>ICMCICFVI LR                                                                                                                                                         | 102 |
| G63 | IV:1278944..1279091   | 363  | -       | -/ PS50883 (EAL domain profile.)                                    | MGWRHPETLTNLPPSQFLPIAETTNFKF<br>MNDVYLVEK                                                                                                                                                                                                                                  | 37  |
| G64 | I:14308479..14308887  | 354  | -       | -/-                                                                 | MSTCSNQLKHLSTIQNFDWVTTILDLP<br>HRETEPRKYEITRDDGVKSVCGLNRGVQ<br>FX                                                                                                                                                                                                          | 59  |
| G65 | V:5768239..5768632    | 343  | -       | -/-                                                                 | MKMAPRLMYIIHHHSKLSASHDLLSLSL<br>KKRRDDTRGDGNSNVLSVSCSLIDLPLIM<br>SFL                                                                                                                                                                                                       | 61  |
| G67 | V:3576900..3577317    | 288  | -       | (G0PEE4_CAEBE)/<br>Serpentine type 7TM GPCR chemorec.               | ILSLSLQFSKCSKSETFLCCWQGLAYTSHA<br>ITAVLVSFHILGGYCILLKTPPMASYRW<br>PLFNLHFW                                                                                                                                                                                                 | 67  |
| G68 | II:6978237..6978540   | 271  | -       | -/ PF07735 (F-box associated)                                       | VVCVVDCLILEGEIYPLSSAQLLAQRRL<br>PRNFRELKLLIGIPLNDLLTSCSSLHTYN<br>SLSTDKDINFLRHWTAGLKPELEFLTIL<br>NIHARIKLSILFSVASTFTFLKE                                                                                                                                                   | 113 |
| G69 | X:14916816..14916993  | 271  | -       | (Q84LU4_GINBI)/-                                                    | MFFRHMSQGFCSWKKHRKPGDX                                                                                                                                                                                                                                                     | 22  |
| G70 | V:13060163..13060498  | 251  | -       | (G0P3Q5_CAEBE)/<br>Peptidase_A17                                    | IQRKSENKCKNHDMFNTWCSDYSYKSAK<br>LIMFSDVSKNNDGLVAYI.....<br>FEYKDGHAQSKLVMAKSRVKSSIPYRG                                                                                                                                                                                     | 46  |
| G71 | X:11701412..11701730  | 251  | -       | (Q4R178_CAEE)/<br>PF07735 (F-box associated)                        | MNIKCEEAQIWKNNLSLQDIELFIRHWLS<br>GNMPNFKCLRHDYQNVRFWINALRGID<br>SRVRNPLSQPKTYKFLNMYISKQGNII                                                                                                                                                                                | 86  |
| G75 | V:4970301..4970493    | 147  | -       | (A8WQ28_CAEBR)/<br>Serpentine type 7TM GPCR chemoreceptor           | MSQKFSKLQVEILRALTIQTLVPIVSSVLP<br>CVICWYFPNFPNIACEL                                                                                                                                                                                                                        | 47  |
| G76 | II:11805687..11805840 | 136  | -       | (Q9XX13_CAEE)/-                                                     | IERVDCEGKDVLSDDGLIATIKYKNCGID<br>FLVWHEKFPIDLMQRFEMRNKI                                                                                                                                                                                                                    | 52  |
| G78 | V:6699013..6699454    | 134  | -       | -/-                                                                 | MISFFQISKNTTIMISFAIKQSYSCHGVVCS<br>VVKHEKTSVGEKYLVSSTVFLISELFAFCD<br>LTNTFSAHRPYKCKRHLHFDSRKFYGNLKS<br>SLDTSHAFL CRLICLGF                                                                                                                                                  | 108 |
| G83 | II:3733728..3734019   | 116  | -       | -/-                                                                 | MFDIFQIRPVLPDLLDLRLIEKHSNPNFSV<br>SLHTKYNPFLDQSRKMISFFQISKNTTIMI<br>SFAIKQSYSCHGVVCSVVKHEKTSVGEKY<br>LVSSTVFLISELFAFCDLTNTFSAHRPYK<br>CRALHFDSRKFYGNLKSLLDTSHAFLCRL<br>ICLGF                                                                                               | 154 |



|      |                          |     |   |                                    |                                                                                                                                                                                                                            |     |
|------|--------------------------|-----|---|------------------------------------|----------------------------------------------------------------------------------------------------------------------------------------------------------------------------------------------------------------------------|-----|
| G85  | III:669337..66<br>9397   | 112 | - | (A0A0P5LGG1_9CR<br>US)/mobidb-lite | MKTNISKKNESSTKRRKTSAKRQKSVPV<br>LPCFLPFFHTFVLFVFTLLHRYATSLFLFF<br>FVKHHSSAFSIECTRYIKKGNLVAPPPVV<br>RGEI                                                                                                                    | 91  |
| G86  | II:4548339..45<br>48606  | 111 | - | -/-                                | IELLHYNFKNSPTFFQETLQRGLVKQKI<br>KTVPPIRSTDKDITNLPFNPIEDETTFDVT<br>KNVSTKNLTVSSKTHKLWFICRIVSVWRY<br>QNITRFF                                                                                                                 | 95  |
| G89  | X:7713027..77<br>13081   | 108 | - | -/-                                | MRIRLLLHFTSHLHSSISGIVNTLIVEDT<br>QMCKEKKTARKARTICTIAW                                                                                                                                                                      | 51  |
| G93  | I:10067869..10<br>067959 | 104 | - | -/-                                | ILLKRLIVSHETPWTTHTCTFIQNF                                                                                                                                                                                                  | 24  |
| G95  | II:3857180..38<br>57426  | 101 | - | -/-                                | ISFSNSIPSIRRDSDVSIASLVKRGKDTATI<br>DVGEFYLYFNSFSPVFNNDTETRYYYD<br>EKGFYIYSSLNHLTPYGLEHVRHVWTEVC<br>AKL                                                                                                                     | 92  |
| G97  | I:6983892..698<br>3949   | 97  | - | -/-                                | MLDAKMQDHSAQLLVFGNFVVISINLISF<br>LSHFDDGSRCEKX                                                                                                                                                                             | 41  |
| G98  | II:9428645..94<br>28735  | 97  | - | -/-                                | VKKQYKPRKWYSLLVHVYFHNKFENSK<br>KLLKSK                                                                                                                                                                                      | 34  |
| G99  | X:13784500..1<br>3784599 | 96  | - | -/-                                | VISHFENHILFSSVSLVTKCIFNGCYTYVM<br>NFEKHFLVNCCC                                                                                                                                                                             | 42  |
| G100 | X:7369398..73<br>69593   | 95  | - | -/-                                | LVLTNHLSKKVCIHTLVVPLICFRYGIPEP<br>SAPFSALFGLGRNMKTFSSSFLRIIYFLFN<br>IFSHKCDVLFSSVF                                                                                                                                         | 76  |
| G103 | III:7619994..7<br>620480 | 92  | - | -/-                                | VQKFVCSISFVKQFNSCDEYINPNLLKGI<br>SQLCHLMVQTFCSHKQSTFTPDCHVHIFL<br>SFLLAIFPCLSQPFLSSTSTLHGHHQR<br>PQTHIISCHKPPSFLSIPNDLSRRILEKER<br>EFKTLRRQCDQACQSHIVRLSHRNPIIFTF<br>LPLIRVHNEIESPVFRGTSYVIREFMRFEI                        | 180 |
| G106 | III:7546511..7<br>546649 | 91  | - | -/-                                | IEFYGSFTLSVSLYTSSSLKIGRVFVAKRK<br>YNLKVVLCSFPLLFHGLKISVIQEKIILKIN<br>QLGQKCT                                                                                                                                               | 70  |
| G107 | X:14567563..1<br>4567626 | 91  | - | (H3D5Q5_TETNG)<br>-                | ILSTVNFGNVLFWQQAHVFLTGL                                                                                                                                                                                                    | 24  |
| G108 | II:3997148..39<br>97499  | 90  | - | -/-                                | IFAHNGKLFVNLNFQKEFLVSPVFAKT<br>PSVHRNHTENYVGKYWGMVMPETIKT<br>DQWVKYQEKLMVKGFENFHKFLSKIFQ<br>NALKISGRLETIFGVLKNCGKLDKVLFRY<br>FQETLKFF                                                                                      | 121 |
| G109 | X:16024200..1<br>6024737 | 90  | - | -/-                                | MHRRSHRCKTFHVTDDQHAGLGADVHVS<br>TAVARRPAPATFLCASYMTPRSLSLCILY<br>ALSVCSPSTSLVKKRWNCVPCNELWSIR<br>RGEIGKAERMMEIRTTDKICYGVRVLSIIG<br>NYWFLIYNPWFAGTILNMFLFLGNKIYV<br>FNHENILIASIKSLNFRNLKVRSPPDFS<br>VKKFQKHMIFKLLNFPKAKKFKV | 198 |
| G110 | IV:2212713..2<br>213040  | 89  | - | -/-                                | LGAGVHGSHVIYVRGSHVCGDVNELGGSV<br>NKNWESIKNILEIRRSYIEINKLRTDPYF<br>KAVNTQLNLDMPESRICPLRIGMCWEFG<br>EGSDRRSTDRPSGRDSSKF                                                                                                      | 106 |
| G111 | IV:1212666..1<br>213077  | 88  | - | -/-                                | LVGKKERGLIRFVLCSSLFLAHHNEDTIS<br>FFPFFWQNLAHFSLTVSEIPAFFHFKSC<br>PVFLTVLISA AFCSTLSDFCGIFPIFRRTLL<br>AFYSTLPTFCKTLPFNSTLPFCRTFPAL<br>CSTLPLWSTLPVS                                                                         | 133 |
| G112 | X:13380046..1<br>3380358 | 88  | - | -/-                                | MIIFPTSTNKKLERAHSYSPRFREVSFKL<br>NALRFFDIQPFQDDSTSLNRRFFENLE<br>RKTFFKARVSILRVKFIHVLTANSADLL<br>EMTAYTLIVFNI TET                                                                                                           | 104 |
| G114 | X:14344402..1<br>4344645 | 86  | - | -/-                                | MIPTHSVPTALNKRKSFPERYQGTAVQ<br>KQITRYLPLGNGHFCKRFRVIFSMCTNC<br>VTVSGFQGLKVGYYEIGVSMILD                                                                                                                                     | 84  |
| G115 | III:214502..21<br>4871   | 85  | - | -/-                                | IIGFWVRETLQTM LGRCERRKMWPDMF<br>SSIHVPAGDPKTHGNQVYTMSSCESEQ<br>YFKPIPNFLRFLPKNWQHGFETQNR<br>NHRFSGTTNHRVQVRELKNSFYQASR<br>CPLETPRKTPHNVTMFNYFKN                                                                            | 133 |
| G116 | IV:1287156..1<br>287513  | 84  | - | -/-                                | VFFDSFSKFNISTYIISAGNPDFSTNRKL<br>KSRFSVEFKPNLGFSEMRIFANAGCREK<br>PILNFISATFRKISRFFPEYYSRFAEIFEK<br>FPSIFSQNLNFRSRKPIFGSISAKFLRNL<br>KFP                                                                                    | 126 |

|      |                            |    |   |                                                                        |                                                                                                                                                                                                              |     |
|------|----------------------------|----|---|------------------------------------------------------------------------|--------------------------------------------------------------------------------------------------------------------------------------------------------------------------------------------------------------|-----|
| G117 | IV:9866734..9<br>867040    | 84 | - | -/-                                                                    | MIAKIYTISIVYTLVFISKNRRTTSPVFPQFD<br>QNKTTLGDEFEIRIFLKHQDQFFHELLQD<br>MSFWSYNSSIRVVFHIVMS                                                                                                                     | 79  |
| G121 | IV:3654868..3<br>655246    | 82 | - | -/-                                                                    | ILTLIFYHLSPKFFTTVQKIYANFFTRSM<br>ETGTLQNFQFAIFPKKLFSSKLVAFSEELP<br>QVLNKQNAIFCKSCSQSTIGCSLLRVHLW<br>SIREQLSPTSITPLALAAPRAQPPQRTFCE<br>NRMLLTDWIRSSFSIIFLDMYSLCSFLRKK<br>GSRGLVFCVLFQFWHVFFVFWGQKFLA<br>EVSRN | 182 |
| G122 | X:743277..743<br>580       | 82 | - | -/-                                                                    | MPSGVINCISRQLINPKNVLTRAQCPDLIE<br>MVEDRNDPLTNINNCFLIGHCCFMRKV<br>KNLQVEYFLTRVNIICVFLTWCLLFLFETIL<br>QFFSQIGFFVCK TTKSGSGIFFAVLLIKX                                                                           | 118 |
| G123 | III:12582510..<br>12582588 | 81 | - | (A0A0L8G6E5_OCT<br>BM)/-                                               | LVHDYFEYIFIFGGVQVFKGKIFYLKASNN                                                                                                                                                                               | 30  |
| G126 | I:14314870..14<br>315371   | 78 | - | Sequence ID:<br>NP_001361903.1<br>/FBA_2 domain-<br>containing protein | MEFFLDIFNQAELTYLKLSHSGLSFLPILK<br>DFNRFNKLVDSDRLKSIQKYAAVAKSLK<br>TYYVYSELLIQNFQKLIKTRRPHHITLDDL<br>LLINGERVILTAHLSSRDNTLFLKH                                                                                | 114 |
| G127 | III:9992028..9<br>992310   | 78 | - | -/-                                                                    | IATLAANLQVTARRFRLPYRRCCKGALSV<br>TVSDFSPFSLPEYRREIVLTIERKEEKEML<br>RRTWEQNDLHSFDGWNGTENEREIPMV<br>DFYD                                                                                                       | 90  |
| G129 | X:15255109..1<br>5255442   | 78 | - | -/-                                                                    | MADTSQLSNCSTDPSTHVNVDMVPMSD<br>YLKLNKNTCDASIAKFARFTEAIDALICDKS<br>PSAVPVQASNPFAVTAAPSQVLPMSFK<br>MHPPTFSSYLSHEISREMLSISFHSPPQSF<br>VIIAGWKADP                                                                | 127 |
| G130 | X:9603752..96<br>04172     | 78 | - | -/-                                                                    | ISNHSQVMSNHTNLPTIFEEGFETYLEL<br>AHVDDDEASGSDLSLNTEDSTIDLEFLGTF<br>SHYDENPNSSTFTVDLNSCDFSNPDAA<br>IFEDIKIRLGSNDLSTFPNENEAVYKTPN<br>NQIEESADSRNAKKDESVKRWWQFWG                                                 | 143 |
| G131 | II:12979623..1<br>2979845  | 77 | - | -/-                                                                    | MNTSKSTYACLKIFKETYTCLNTFDVTYA<br>CLKTYKGTFA                                                                                                                                                                  | 39  |
| G133 | II:6310391..63<br>10769    | 76 | - | -/-                                                                    | MQTAHSMRQRSLISKIRYHLGDSSKVKVR<br>EWWRENVKRNKENKLRKFSLLGTSFLE<br>YAHRLPSLFLIDGLAKKSKVETRDRMIA<br>TLYRLEKIFKLCHSDRKIFKYLFLHNV<br>NYFFFDIQNIFQN                                                                 | 128 |
| G134 | III:11729720..<br>11729903 | 76 | - | -/-                                                                    | IGDFSRVDFRLLFFQQLQHFKLPKISRIS<br>FQIRNQKRMFDHLNFLCSHFQKTTIGGK<br>EHLNSQQISYKIIK                                                                                                                              | 76  |
| G135 | III:1446243..1<br>446597   | 76 | - | (A8Y423_CAEBR)/<br>mobidb-lite                                         | VAWTTAAEAAELKWSDLQKGGDFGG<br>KKTERRKRDQLTPNAVDSIAKRTLQKIGV<br>DFSHHALRRG                                                                                                                                     | 66  |
| G136 | I:13395200..13<br>395593   | 75 | - | -/-                                                                    | MLKKQDSKFLKMKNKSYITEKENPQKT<br>RRIISILGLKWKTRSSRCLRLSHYLSLIYSL<br>YSRLKIERNWWFDRKMKMKEEGFQENK<br>KH                                                                                                          | 88  |
| G137 | V:10032341..1<br>0032656   | 75 | - | -/-                                                                    | MMIENLPTQMTITYFSVPSSFMINITG<br>DNLELTSTTKSSTGNFKQKLEELEQKRAA<br>EHWCCVFSNYIFSVPVGHF                                                                                                                          | 79  |
| G138 | V:8678462..86<br>78762     | 75 | - | -/-                                                                    | MRIFSTFNITYMNSAFSSNPLPVCQFLT<br>NSTQFPKLQRKLPHTSHTRAQIFPKSFSP<br>KLVNAANKIRV                                                                                                                                 | 69  |
| G139 | X:9646607..96<br>46910     | 75 | - | -/-                                                                    | INLLSFFGQRVKWRENPPTPHSHVIMS<br>HLRRRQRASMQIALKSEQCVPRGEQKAR<br>QQUERAGSALLFLIPLPEHRGLRMKGAQLF<br>VILTFPPSPYHYHFCHLEFLSLHNVRNA<br>TGFSKK                                                                      | 121 |
| G140 | I:11500352..11<br>500649   | 74 | - | -/-                                                                    | MPKPIILPFSQLSSNRRGVYLLPFCREEG<br>VDPLPVLINFLSRIPGFVDEKLRIASLWTK<br>NSFLQINFFEFKPEPETSFSEFASISHCAILT<br>GAVGNRHQLDENNQSSNPGKAH                                                                                | 113 |
| G141 | I:12612423..12<br>612753   | 74 | - | -/-                                                                    | MRILKENSQAKNISAKIEWNYSKRSQNSK<br>HQCPVKHIYNLLTPINIGRQTTFNQKSSM<br>FKNREDFKQLNIHLCLGKFPNTQNSRIS<br>RKNGSFEVIFCLEKRGILRRQRIEEKELCH<br>TKNRLTFWVNDIPSTQR                                                        | 135 |
| G142 | I:4819997..482<br>0081     | 74 | - | -/-                                                                    | LETSPILETFENVKTLS                                                                                                                                                                                            | 17  |

|      |                      |    |   |                |                                                                                                                                                                                                       |     |
|------|----------------------|----|---|----------------|-------------------------------------------------------------------------------------------------------------------------------------------------------------------------------------------------------|-----|
| G144 | II:1696730..1696958  | 74 | - | -/-            | ILKIVGVDGGESYFRVVSFFEVAKQDFE<br>VGLFKDSQLDSICHLIWFVLISIDPNEFQN<br>FLEVLYGHHQAITDFVSLTRPLLKFNKIF<br>R                                                                                                  | 89  |
| G145 | V:12890577..12890904 | 73 | - | -/-            | IKYTRLTAIANRESGNNEYSKSSWKLKSS<br>LNSARRLENSIKKYGRRDAKLLNNTFIFA<br>FFSSGVNYTHLPNQCATLDNMLSLQKLV<br>EKFQEEFGENVGVGNYSIKSCFNF                                                                            | 110 |
| G146 | X:1120485..1120578   | 73 | - | -/-            | MRSIIQSCSLSRRTNVRHVPPLAFINSIIQ<br>LSFGPCLLPCHLSGPENRSALETRLVTRK<br>ERSTSPSLSVCLSTARLPPSPFPAVYCH                                                                                                       | 88  |
| G147 | V:6564739..6564919   | 72 | - | -/-            | MADWFMVSVFLRFARFYFIQAKAEKSIV<br>VDVILAEIQKYYDFVNIKKYLE                                                                                                                                                | 51  |
| G148 | I:12541606..12541939 | 71 | - | -/-            | IVERSGNYFHSNRNYSFRVFLTKLCDCKC<br>TDRLVITYKSGTISPLCHRNLRSKHLIGG<br>AVSESSFVKITPVIVLDFREKICKTVDFR                                                                                                       | 87  |
| G149 | V:3831077..3831377   | 71 | - | -/-            | IGPNCIPDCHCFTTILIKFYDQALNRVCSK<br>HKTQTQKTLQNIKALYLQFKTQEKFLR<br>RTLTHPQLPGVFAPSILFVYQNEVLTNC<br>TKISSGFQTKRFKFLWICSKHREFGV                                                                           | 113 |
| G152 | X:10433971..10434304 | 71 | - | -/ mobidb-lite | LNMMTQSEKREKIHPNALRERSGSNN<br>AKVHLFNKLFVRPSWSMSSPNNRMLD<br>NKIEEVP TSSQQKIAKRAEELRKLKIIQV<br>EAKNCIKKNAEVEECFYPYCVHENIKDIF<br>YDKTDF                                                                 | 119 |
| G154 | X:854404..854797     | 71 | - | -/ mobidb-lite | MDMLPLCFNFNKAQFNKYNKCSQGLW<br>SYPSSLFVSILFYPDIIQHICKMLAIESIQN<br>KDIKQSSGNNKRTKQHHIVIRDPSTSSS<br>NKNEEKRAIHNSPHKNMVGSSRAPPQ<br>REPNKSPLSHRLYRQIYSFLFCCSAHSA<br>TGQPPPPPTLFTFGGLLLSCLPLLLTILG<br>VFSVS | 179 |
| G155 | V:11699793..11700117 | 70 | - | -/-            | ILPNLFQSQHLIPSALPVAPYNSFSDHAR<br>GTMYSRISGSTHTDPDAIKSVKSKLDVVH<br>TNRYTYREVSSKHNRDNRVSGIKQIVF<br>HLLMLKGGKHQ                                                                                          | 97  |
| G156 | X:14348630..14348903 | 70 | - | -/-            | IEESEKGSSTVYNSFFQIFFCWYKWFICI<br>TTIIVFIQRNKLKNQENCLYSIHMKSQIC<br>SASKRPTSIHKMVTRSQKPSVASTRQID<br>PDVLKLDRAEAEKLRGWRPPKRRELC<br>WNLKRKMMLMFESCFLFIYIF                                                 | 137 |
| G157 | X:5994407..5994674   | 70 | - | -/-            | MRICCSKVPTSQALRRYETESKNHLSLES<br>LRYGYTSEILVNGKLQRYEKTAEKERKG<br>VGGFFDMRFCVWINRANTHISTYLRKM<br>SQ                                                                                                    | 87  |

**Supplementary Table S4.** Genome intervals highlighted by AnAblast as putative new exons of known genes (10). Peak height (Protomotifs accumulation), RNA expression evidences, homologs/motifs, predicted amino acid sequence (ORF) and the number of residues (ORF\_length) are indicated.

| Peak | Genome interval       | Peak height | Express. | Homolgs/<br>Motifs | ORF                                                                                                                                                                                                         | ORF length |
|------|-----------------------|-------------|----------|--------------------|-------------------------------------------------------------------------------------------------------------------------------------------------------------------------------------------------------------|------------|
| E5   | X:3495047..3495548    | 83          | RNA-seq  | -/-                | MVKSNFQIINTSFEIFCFQSSFEKYRKIFLS<br>KLTQVFSRLEKLYIDIKIKLVVPSHNISKL<br>CIKLSQAIKLRKLSMTEYIE'TAIIFSLFP<br>PVFVSLSLKYFSQPYFPIKYTKVTKSNDFSE<br>IT                                                                | 127        |
| E6   | X:6799982..6800363    | 79          | RNA-seq  | -/<br>E3LDB8_CAERE | MNQKSSLLSFLLSTRDHQTRTVNHCM<br>YVCATSVFRMFVTKIGGNLGCNANRFDV<br>VVLFSHWFPFIFILSDPTTHQNLPPSRLN<br>MPQSSKFTTNPKIMYSIQICQVWHTVFN<br>SPSSSVIFLKSRRGRTLPHLKGCRFGLCVR<br>KLYF IGCSSFSKVFSDSDFYIFSRCLCPY             | 176        |
| E7   | II:13888312..13888573 | 73          | RNA-seq  | -/-                | MTENRKISIFATFSCFKVIFHRKNPQFPEI<br>PDSIKSANTNIPTATRPQRVSPPTFPLSRH<br>LFISFVQLYCLLCIVALSINFYFIYKITTP                                                                                                          | 92         |
| E13  | V:13768591..13768795  | 121         | -        | -/-                | MWILRKISVNFVKVDKSVTTPNNSLNQ<br>KILHQIRYSPANSSIAVDISTQKNSFTSAS<br>CPPN                                                                                                                                       | 64         |
| E14  | X:10674619..10674925  | 80          | -        | -/-                | MLSGFQQQLSPSTTPARFFALPEDWLP<br>RQQVPDISYTSHTNIKFLHQQESCFPIKTR<br>ILFLANELENFALWVVGVSISERERESEK<br>SSSNLRIYA                                                                                                 | 98         |
| E18  | V:7882127..7882430    | 79          | -        | -/-                | MNWNKLLSLNPETLLPRAFDGHFFWR<br>KLYSIGSANNTMFTKEYRELIRSGIFPPGQ<br>FRNDQQVGFDFPFRWGEVITVCRKACHP<br>NVLQPNNTYVFFIPT FQLFSSLPMFLP                                                                                | 114        |
| E23  | X:6001927..6002254    | 74          | -        | -/-                | MKSTVPLESPHFPEKPFNHFCFLASLFP<br>TSYPECLGYCCTIFGTKYLHLVQYKSIN<br>ALAHRLANMLIVEAMGGAPTRRLAPIKE<br>RRGFIFSVTSHFSSKHLLNYGLSDFDFSN<br>FLFFLVAYIFLECGIGTRRFKYEIIRNAH                                              | 149        |
| E28  | V:5856625..5856859    | 120         | -        | -/-                | MLGPKPILKSHVKKHSDVSGFSLNRYIN<br>CTTACVNDPSSCISKSLNANFEIRNGCRS<br>QNIHARKMPKSGIKSIELTYIYF                                                                                                                    | 84         |
| E29  | V:3445206..3445602    | 80          | -        | -/-                | MNSIRVPFETPMLAQLGYIPQHVTKFSYP<br>EPYLFLIFINLYLFSDFIPDLNIENLAKNIS<br>NLIKTFPIYLGWIYFSSACKHSLHISSTISR<br>KKIVSPYWFFDAFDALYDEKVLFGYLSLS<br>YIFDTPDIADHWMLGQSSCVYCMIVVVL<br>GK                                  | 155        |
| E30  | X:3170746..3171163    | 83          | -        | -/-                | MNTIARFGKRRCAEKKIRHNVMYRATTE<br>DGKLLRFNQVSKYFSCIPSISTDLQYTS<br>FNNFRKHCVFQVTKKVKRRESKQINGR<br>REQGPIQISGGNQFQIFARGFRWSAIVIFIS<br>NLFITTFGYSNIEGRYLESRQHVFSDFFFIC<br>RFLDLTLPFSLKTKICLFFILKNFPFKNQ<br>LPQPK | 186        |

**Supplementary Table S5.** List of primers (forward and reverse) used for PCR cloning of each selected peak predicted by AnAblast as putative new sORF or exon at the indicated *C. elegans* genome interval. Primers were designed to avoid secondary target genes when expressing RNAi.

| Peak | Genome interval       | Forward primer        | Reverse primer       |
|------|-----------------------|-----------------------|----------------------|
| G5   | IV:1213206..1213443   | gcagtgagcaaaagtggtg   | tttgccttctctggcgc    |
| G14  | II:11736898..11737084 | gagtgagagagtgggcgaac  | aaaaatcgacctcgcat    |
| G15  | II:4175282..4175657   | tcagtaccacgcaacagtcg  | atcgacattgggattggcca |
| G22  | III:670901..671255    | gcgtgtgaactgatcgctt   | ttctcgtcgtcgtgtctt   |
| G23  | III:5838386..5838494  | cgccaattagtcagctgcc   | gggtgtttctcgcctctca  |
| G25  | X:17515475..17515919  | tggagctagaatgttcagggt | ctgtgcacagtgaggggatt |
| G26  | II:11717583..11718477 | ccgcctgaagattgattcgc  | aaaacgtgagccagtgctc  |
| G30  | II:13644506..13644671 | tggccttctgcaactgtgt   | cttctgacgagccctgt    |
| G31  | I:12928143..12928563  | actgaagagtgcacagctga  | acgagccagggaacaaaaca |
| G32  | V:13396252..13396714  | tttgcgccatctgctctaa   | tctgctctggtttccgtg   |
| G43  | X:15015384..15015639  | cttgcgttctcatgagcgg   | cctcaatgctggtgctgtct |
| G45  | III:7833431..7833716  | gtgcacgggtatgctgttg   | tgccgtcacagtctgaacaa |
| G46  | I:7316251..7316590    | atcggttggtcatccgtcac  | ggtgtgcccaattcgattg  |
| G49  | V:14367725..14368037  | cttgagctgtggtctgctgt  | gggggaaaagctctgaggt  |
| G50  | X:16728266..16728758  | agatcgtctacccttccga   | cggactcttctctgacgca  |
| G51  | V:8646870..8647347    | gtgggtgatgttcgggaca   | acaaaaaggccattattga  |
| G52  | IV:379001..379340     | cacaaggcgttgctacatt   | gatgaccggaaactaggcg  |
| G54  | III:4101011..4101389  | agagaggtacgcaggcctaa  | caaacccacttctctcca   |
| G57  | X:541358..541586      | acacggtactcagcgtaga   | aagagcatttgacggcgtg  |
| G58  | V:19477929..19478157  | ggagaacagcctgtgagat   | cgattcgcaatgagccaagc |
| G61  | V:10709701..10709983  | gagcaaacagtcgacgcaaa  | gcagacctactggacaagtg |
| G63  | IV:1278944..1279091   | acactctaccagtcgaccga  | tttcgacacctcttcgca   |
| G64  | I:14308479..14308887  | ttcatgcttcagctccctg   | ccagttagggaattagggcc |
| G65  | V:5768239..5768632    | gctgagacctccaagtgtc   | cttccgttcttaacacccc  |
| G67  | V:3576900..3577317    | ccgactggcaatgagttcct  | aaacacggatgctaggccaa |
| G68  | II:6978237..6978540   | aagtcgagtgcaaatgctg   | cggcctccaatgtcttaga  |
| G69  | X:14916816..14916993  | ctcgacgtcttcccctttt   | ccaatggcaggtgatttccg |
| G70  | V:13060163..13060358  | acgtgggagggtagagatc   | gcgagtagtgctattgc    |
| G71  | X:11701412..11701730  | cggtgaaaattgccgtccat  | tcgctcaatccacgca     |
| G75  | V:4970301..4970493    | ttcgtctatggcgcatat    | cctctcgtctggacaagcag |
| G76  | II:11805687..11805840 | agcgtgacggattaattgct  | tatgtccccaccagatt    |
| G78  | V:6699013..6699454    | tccgacctgtttactgact   | tcaaatgaagagcacggcac |

|      |                        |                      |                       |
|------|------------------------|----------------------|-----------------------|
| G83  | II:3733728..3734019    | tgtgcagccgtttcagttg  | ctctgggctagagtgggat   |
| G85  | III:669337..669397     | acacggttgctatgagcaa  | ttttcaactgtgccccact   |
| G86  | II:4548339..4548606    | ggcactctctgatgtagcc  | tcttcgatggggtgaacgg   |
| G89  | X:7713027..7713081     | tgactccatatcctccgga  | acacgaatccggctgaatgt  |
| G93  | I:10067869..10067959   | gtgtgtgtgttcgacga    | accaactcataggtcacagt  |
| G95  | II:3857180..3857426    | gctaccattgatgtgggga  | acggacggatcacctgaaaa  |
| G97  | I:6983892..6983949     | ttcctgcacaccaattgtca | ttcacacctgaccgtcaa    |
| G98  | II:9428645..9428735    | gctacaatttgcgcttgcca | gctagccagactgacccaaa  |
| G99  | X:13784500..13784599   | tttcagcactttcgggact  | tgaatgtgggaaattcgtggt |
| G100 | X:7369398..7369593     | tcacactctcgtgtgcctc  | ccgagctgacgtgaactctt  |
| G103 | III:7619994..7620480   | aaccttcacacctgactgcc | ggaagacggggctctcaatt  |
| G106 | III:7546511..7546649   | tgtgaccaaggaaccaca   | ggtttccagtgaatggccac  |
| G107 | X:14567563..14567626   | tcggaatttgatttagcg   | agaagtgggatcgtgaca    |
| G108 | II:3997148..3997499    | cggaatagtgttcgacg    | ggcatcaccatcccccaata  |
| G109 | X:16024200..16024737   | ggcgcgagagataggaaaa  | tggggaaggcgaaggaaaa   |
| G110 | IV:2212713..2213040    | caaagcacagaacacacggg | Cagcacatcccgatcctcaa  |
| G111 | IV:1212666..1213077    | ccgtgtttggtcggcaaaa  | cgcaaagtgtcgagaaagt   |
| G112 | X:13380046..13380358   | gtccgagtttcgtgaggtt  | tgtgacgtacagatgcaca   |
| G114 | X:14344402..14344645   | ttgaaagatcggtagctgc  | ccaagggcaaatatcgcgtg  |
| G115 | III:214502..214871     | catgtaccgctggagatcc  | gcaacctcgaagctgagat   |
| G116 | IV:1287156..1287513    | cacacacatcacggaggaa  | tccgcgcgaaatctggaata  |
| G117 | IV:9866734..9867040    | tggcaagaccacacagaaa  | tggcaacctgtttcatca    |
| G121 | IV:3654868..3655246    | aacttctccaactcccc    | tgtgggggacaactgtcac   |
| G122 | X:743277..743580       | ggtggaataagtgcgacca  | tcccactccggatttggtg   |
| G123 | III:12582510..12582588 | tattgttgaacgcggcac   | cctgattgcagttgcgata   |
| G126 | I:14315133..14315517   | ccgttgcgattgttcatcg  | ctgtgtggcctaatcccta   |
| G127 | III:9992028..9992310   | ttgggtcgcgagaacttccg | tcgtttgttcccagctcct   |
| G129 | X:15255109..15255442   | ttctcagctctgccagtg   | tcaggggtctgcttccaac   |
| G130 | X:9603752..9604172     | acttagagctgcacacgtc  | taccccaaaaattgccacca  |
| G131 | II:12979623..12979845  | ctcaaggtgacctgtcct   | ccaacttgcgaattgccca   |
| G133 | II:6310391..6310769    | tgggtcgtgagaatgtcaa  | gcagaattgacgttgccaa   |
| G134 | III:11729720..11729903 | agacgcgtagatttccgct  | tcctcgcaaaaaaccaca    |
| G135 | III:1446243..1446597   | aacaagtgaggaccgacgac | gtccatcagatagcgtgcga  |
| G136 | I:13395200..13395593   | gtcgtccaaggcctatacc  | ctccgacccatttctctgt   |
| G137 | V:10032341..10032656   | gctccagcagctactagacg | tcgtcgtgagctttccaaa   |
| G138 | V:8678462..8678762     | taccgttccagcagttgcat | tccatgtccgcatcgaaca   |

|                   |                        |                       |                        |
|-------------------|------------------------|-----------------------|------------------------|
| G139              | X:9646607..9646910     | taaaatggcgcgagaacct   | cggccattgacctatgcg     |
| G140              | I:11500352..11500649   | aggagggtgtggatccgta   | tcttaccgactgcgccaatt   |
| G141              | I:12612423..12612753   | atcaacattggcgcaaac    | aggaagtgtgccaacccaa    |
| G142              | I:4819997..4820081     | atagcagtgggagtagctgc  | tggaatgacgtcggttaagagt |
| G144              | II:1696730..1696958    | tccgctcttagccatctgt   | agtctgtgatggcttgggg    |
| G145              | V:12890577..12890904   | aagtatggaaggcgggatgc  | tttctcgtgaacctttctgt   |
| G146              | X:1120485..1120578     | cctcatgcaatcgccagga   | tcagttgagcaacgggagac   |
| G147              | V:6564739..6564919     | ggaacaaaatatcggcgccc  | acattgcacgacctttgtct   |
| G148              | I:12541606..12541939   | ccccctattcgtcccaac    | aatacgcgtaccggaact     |
| G149              | V:3831077..3831377     | ccccaattaccagcgtctt   | ttccacaacaggtacgccag   |
| G152              | X:10433971..10434304   | tgaaaggagtggcagcaaca  | cgtcacgtttcataatgcca   |
| G154              | X:854404..854797       | atgctcctccaaggtttgt   | gaagtagtggcgagcaggag   |
| G155              | V:11699793..11700117   | ccgtgctaccgtatgtct    | acaccacctgggatatcca    |
| G156              | X:14348630..14348903   | tgtatgtcgtgaaactgtca  | tccaccgcgaagttttct     |
| G157              | X:5994407..5994674     | tggtttgcaagagtaccccc  | atcctcccactccctcctc    |
| E5                | X:3495047..3495548     | ggtgttaggcggttaaatggc | gcgccgaaatacagaatgtga  |
| E6                | X:6799982..6800363     | tcaaccgagaccatcaaca   | acggacacagcgactaaaa    |
| E7                | II:13888312..13888573  | gcctctcagtactttccc    | ttttcggctcggcgaag      |
| E13               | V:13768591..13768795   | ttaagcggcggaaactcaagt | gaacggagaagacgcagaca   |
| E14               | X:10674619..10674925   | acatccctcaggtgacaag   | tatggaaaccgagccaacca   |
| E18               | V:7882127..7882430     | acatgcactccccactcaag  | acaaagcgatggtgaaaaca   |
| E23               | X:6001927..6002254     | acgaaccaagtcatgcataca | gtctcgttctatcccgcat    |
| E28               | V:5856625..5856859     | tgaaaatagactccccgggc  | ttttgcgctcccgtttct     |
| E29               | V:3445206..3445602     | gcaacctgacacccttgaa   | cgtagcaaaactgtgatcgt   |
| E30               | X:3170746..3171163     | aattcgcacacgtcatgt    | tgggctgcgtagttgattt    |
| unc-22<br>Exon 20 | IV: 11993323..11992879 | ccaagtaccgaacgaaagac  | tctgaccacaatgcttact    |
| unc-22<br>Exon 23 | IV:11989007..11988644  | gttctccgctactggaaca   | gttctcactgggatgctga    |

**Supplementary Table S6.** Percentage of animals that reach adulthood in the indicated time (hours, grey rows). Average, Standard deviation and P-value of the differences by T-test. Normality was previously assessed.

|                | % Adults / Hours at 20°C |          |         |          |          |        |
|----------------|--------------------------|----------|---------|----------|----------|--------|
| <b>Control</b> | 47                       | 48       | 50      | 52       | 53       | 54     |
| Average        | 29,57                    | 72,97    | 96,00   | 99,59    | 100      | 100    |
| St desv        | 2,83                     | 7,92     | 23,11   | 0,91     | 0        | 0      |
|                |                          |          |         |          |          |        |
| <b>G71</b>     | 47                       | 48       | 50      | 52       | 53       | 54     |
| Average        | 3,44                     | 14,22    | 54,76   | 80,96    | 94,94    | 97,93  |
| St desv        | 8,23                     | 4,08     | 3,21    | 11,52    | 7,15     | 4,62   |
|                |                          |          |         |          |          |        |
| T-test         | 0,0001                   | < 0,0001 | 0,0042  | 0,0069   | 0,1528   | 0,3466 |
|                |                          |          |         |          |          |        |
| <b>control</b> | 48                       | 49       | 50      | 51       | 53       |        |
| Average        | 64,71                    | 91,22    | 97,00   | 100      | 100      |        |
| St desv        | 10,37                    | 3,45     | 1,39    | 0        | 0        |        |
|                |                          |          |         |          |          |        |
| <b>G107</b>    | 48                       | 49       | 50      | 51       | 53       |        |
| Average        | 76,33                    | 83,04    | 85,03   | 89,68    | 89,68    |        |
| St desv        | 6,65                     | 6,59     | 6,19    | 3,27     | 3,27     |        |
|                |                          |          |         |          |          |        |
| T-test         | 0,0680                   | 0,0222   | 0,00155 | < 0,0001 | < 0,0001 |        |
|                |                          |          |         |          |          |        |
| <b>control</b> | 47                       | 48       | 50      | 52       | 53       | 54     |
| Average        | 20,38                    | 34,35    | 47,06   | 68,16    | 91,57    | 99,10  |
| St desv        | 3,58                     | 6,83     | 4,95    | 4,79     | 2,72     | 1,78   |
|                |                          |          |         |          |          |        |
| <b>G98</b>     | 47                       | 48       | 50      | 52       | 53       | 54     |
| Average        | 13,36                    | 25,49    | 43,79   | 63,18    | 82,56    | 89,04  |
| St desv        | 5,99                     | 2,79     | 4,80    | 4,57     | 6,07     | 6,27   |
|                |                          |          |         |          |          |        |
| T-test         | 0,0914                   | 0,0574   | 0,3783  | 0,1836   | 0,0352   | 0,0216 |
